# Supplementary material for: Elucidating the effects of B/Al doping on the structure stability and electrochemical properties of silicene using DFT
Source: Royal Society of Chemistry journal article supplement (doi:10.1039/d3cp03116k), 2023-01-01
Supplement: d3cp03116k1.pdf [file d3cp03116k1.pdf]

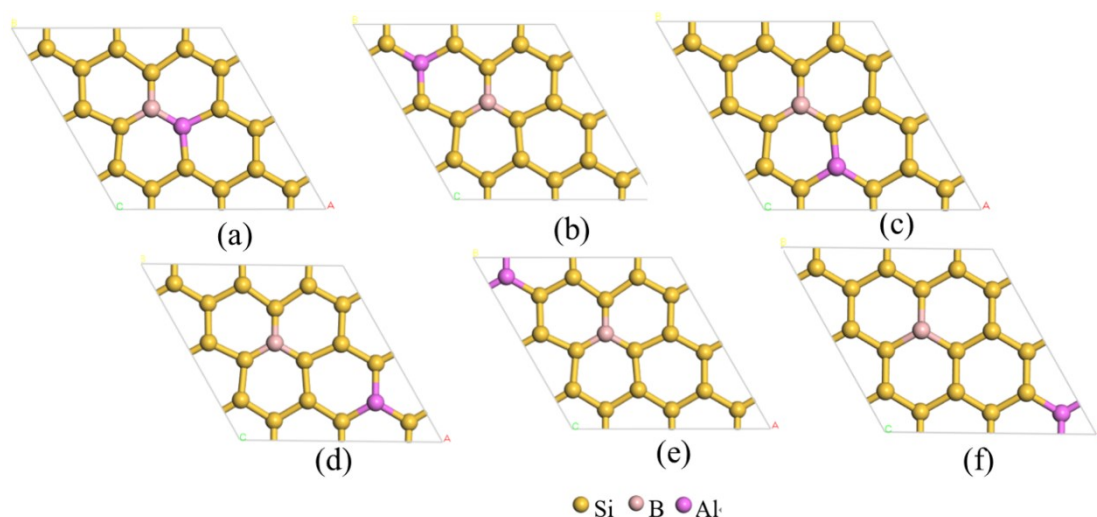

Fig. S1 Structure diagram of B-Al doped silicene at different positions

Table S1 The formation energy( $E_f$ ) at different positions

| Positions        | a      | b      | c      | d      | e      | f      |
|------------------|--------|--------|--------|--------|--------|--------|
| $E_f(\text{eV})$ | -3.148 | -3.143 | -3.151 | -3.144 | -3.146 | -3.150 |

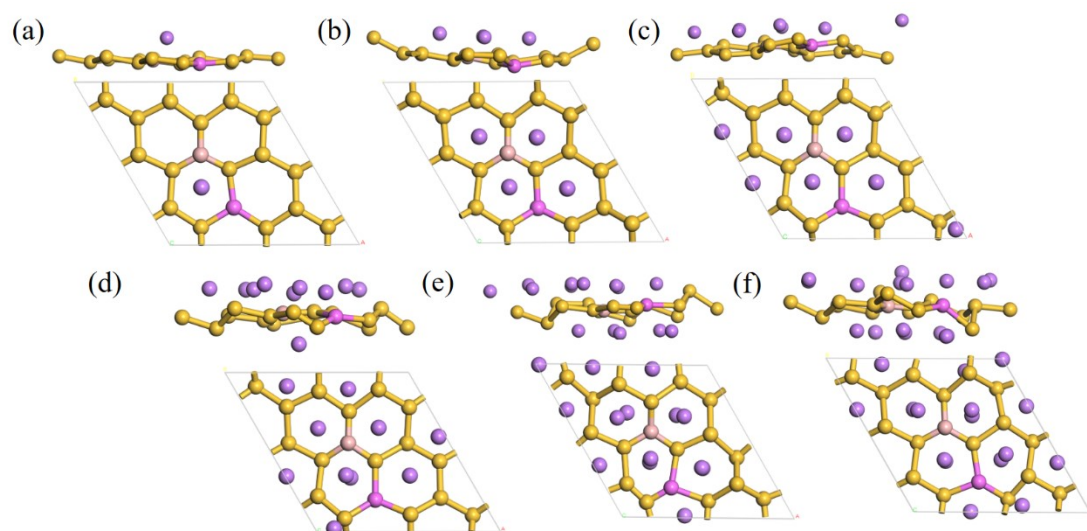

Fig. S2 The side and top views of B-Al doped structures with different amounts of Li ions adsorption after structure optimization.
